# Supplementary material for: Customized optical mapping by CRISPR–Cas9 mediated DNA labeling with multiple sgRNAs
Source: PubMed Central journal article supplement — Nucleic Acids Res. 2020 Nov 24;49(2):e8. doi: 10.1093/nar/gkaa1088 (PMC7826249; doi:10.1093/nar/gkaa1088), 2020-11-24
Supplement: gkaa1088_supplemental_file.pdf [file gkaa1088_supplemental_file.pdf]

**Supplementary Table 1. A set of 48 sgRNAs designed based on RR722 reference sequences.** sgRNA sequences are shown in black. #N/A indicates that the sgRNAs don't have a hit in RR3131. The 55mer oligo are ordered and used in sgRNA synthesis, with the promoter sequence in red and the overlap sequence in green.

| sgRNA                 | RR722 Locations | RR3131 Locations    | 55mer oligo                                                  |
|-----------------------|-----------------|---------------------|--------------------------------------------------------------|
| GCAATCAAAGATGCAGCGGA  | 776             | 776                 | TTCTAATACGACTCACTATAGGCAATCAAAGATGCAGCGGAGTTTTAGAGCTAGA      |
| TGTATGCACTGCACAGAACC  | 9065            | 9067                | TTCTAATACGACTCACTATAGTGTATGCACTGCACAGAACC GTTTTTAGAGCTAGA    |
| TTTTCTTCAATATGAAGCCC  | 14114           | 14125               | TTCTAATACGACTCACTATAGTTTTCTTCAATATGAAGCCC GTTTTTAGAGCTAGA    |
| GCTTTTTAGGATATCGTCCC  | 21722           | 21698 (off target)  | TTCTAATACGACTCACTATAGGCTTTTTAGGATATCGTCCC GTTTTTAGAGCTAGA    |
| CGAATTTCTTTATATAAGCG  | 28588           | 28564               | TTCTAATACGACTCACTATAGCGAATTTCTTTATATAAGCG GTTTTTAGAGCTAGA    |
| GGCGATGTGCTACATATGGT  | 36995           | 36973               | TTCTAATACGACTCACTATAGGGCGATGTGCTACATATGGT GTTTTTAGAGCTAGA    |
| TTACCCGTTTCTACTGCAGT  | 40604           | 40582               | TTCTAATACGACTCACTATAGTTACCCGTTTCTACTGCAGT GTTTTTAGAGCTAGA    |
| ATTATTATTGTGGGATTAAG  | 51392           | 52772               | TTCTAATACGACTCACTATAGATTATTATTGTGGGATTAAG GTTTTTAGAGCTAGA    |
| GCGGTATCCACCCCACTGC   | 59529           | 60913 (off target)  | TTCTAATACGACTCACTATAGGCGGTATCCACCCCACTGC GTTTTTAGAGCTAGA     |
| TAGCCTAGGCTTAGAGAGGC  | 65581           | #N/A                | TTCTAATACGACTCACTATAGTAGCCTAGGCTTAGAGAGGC GTTTTTAGAGCTAGA    |
| GTGTGACATTTTGCGCTAAG  | 76609           | 77990               | TTCTAATACGACTCACTATAGGTGTGACATTTTGCGCTAAG GTTTTTAGAGCTAGA    |
| GTTACATTACACACAACTT   | 86065           | 86656 (off target)  | TTCTAATACGACTCACTATAGGTTACATTACACACAACTT GTTTTTAGAGCTAGA     |
| GGGGCGTAAATTCTTAACAT  | 94393           | 151264 (off target) | TTCTAATACGACTCACTATAGGGGGCGTAAATTCTTAACAT GTTTTTAGAGCTAGA    |
| GCATATTGTTTCACCTGAGT  | 101274          | 158142              | TTCTAATACGACTCACTATAGGCATATTGTTTCACCTGAGT GTTTTTAGAGCTAGA    |
| ACAACGTCATCTCGGTTATG  | 107153          | 163588              | TTCTAATACGACTCACTATAGACAACGTCATCTCGGTTATGGT GTTTTTAGAGCTAGA  |
| GAATTAAAAGAACCGATGAC  | 112870          | 169301              | TTCTAATACGACTCACTATAGGAATTAAAAGAACCGATGAC GTTTTTAGAGCTAGA    |
| CGTAAAGTTTTACTTTGCAC  | 118790          | 184425              | TTCTAATACGACTCACTATAGCGTAAAGTTTTACTTTGCAC GTTTTTAGAGCTAGA    |
| GATCTTATAAAGATAAGATG  | 128972          | 195013              | TTCTAATACGACTCACTATAGGATCTTATAAAGATAAGATGGT GTTTTTAGAGCTAGA  |
| TTTTTAATCGGCGGAATTGC  | 136526          | #N/A                | TTCTAATACGACTCACTATAGTTTTTAATCGGCGGAATTGCGT GTTTTTAGAGCTAGA  |
| ACAACCCGCAATCTTGCCCTG | 141414          | 207996              | TTCTAATACGACTCACTATAGACAACCCGCAATCTTGCCCTGGT GTTTTTAGAGCTAGA |
| AATATTATCGGTTGGTTAGA  | 147554          | 209763              | TTCTAATACGACTCACTATAGAATATTATCGGTTGGTTAGAGT GTTTTTAGAGCTAGA  |
| ACTACAGGTATGAATCAGCT  | 153201          | 215397              | TTCTAATACGACTCACTATAGACTACAGGTATGAATCAGCT GTTTTTAGAGCTAGA    |
| TCTCTGATTTAGTTAAACTC  | 159515          | 221665              | TTCTAATACGACTCACTATAGTCTCTGATTTAGTTAAACTCGT GTTTTTAGAGCTAGA  |
| TGAGAAAAAAGATTTGCTAG  | 167020          | 229172              | TTCTAATACGACTCACTATAGTGAGAAAAAAGATTTGCTAGGT GTTTTTAGAGCTAGA  |
| GTTAAACCTACAGTGCCGAT  | 177007          | 239036              | TTCTAATACGACTCACTATAGGTTAAACCTACAGTGCCGATGT GTTTTTAGAGCTAGA  |
| GCTTCTCGATTTACCAACG   | 187505          | 249534              | TTCTAATACGACTCACTATAGGCTTCTCGATTTACCAACGGT GTTTTTAGAGCTAGA   |
| TGGATAGTCGCACACCTTGA  | 197054          | 259083              | TTCTAATACGACTCACTATAGTGGATAGTCGCACACCTTGA GTTTTTAGAGCTAGA    |
| GCGAGTTTTTATGAGTAATG  | 202151          | 264176              | TTCTAATACGACTCACTATAGGCGAGTTTTTATGAGTAATGGT GTTTTTAGAGCTAGA  |
| GCGACGATGACGCTAACGTC  | 207665          | #N/A                | TTCTAATACGACTCACTATAGGCGACGATGACGCTAACGTCGT GTTTTTAGAGCTAGA  |
| TCTTCAATAGGACTGAACCT  | 213124          | #N/A                | TTCTAATACGACTCACTATAGTCTTCAATAGGACTGAACCTGT GTTTTTAGAGCTAGA  |

|                       |        |                     |                                                          |
|-----------------------|--------|---------------------|----------------------------------------------------------|
| TTGTTTTACGATATAATACG  | 219206 | No label            | TTCTAATACGACTCACTATAGTTGTTTTACGATATAATACGGTTTTAGAGCTAGA  |
| TAGGTACTGTAAGAGATAAA  | 224792 | 286921              | TTCTAATACGACTCACTATAGTAGGTACTGTAAGAGATAAAGTTTTAGAGCTAGA  |
| TAACGTATTAGATGCCACCA  | 230103 | #N/A                | TTCTAATACGACTCACTATAGTAACGTATTAGATGCCACCAGTTTTAGAGCTAGA  |
| AATGGGTCGGAAAGTACCGC  | 236513 | 300034              | TTCTAATACGACTCACTATAGAATGGGTCGGAAAGTACCGCGTTTTAGAGCTAGA  |
| GTTAAGTTTAGTCATCGGTT  | 248383 | 312109              | TTCTAATACGACTCACTATAGGTTAAGTTTAGTCATCGGTTGTTTTAGAGCTAGA  |
| CGAAGGGATAAATATTGCGA  | 253327 | 316470 (off target) | TTCTAATACGACTCACTATAGCGAAGGGATAAATATTGCGAGTTTTAGAGCTAGA  |
| ATTTTCATTGTATAGATGCG  | 259949 | 323064              | TTCTAATACGACTCACTATAGATTTTCATTGTATAGATGCGGTTTTAGAGCTAGA  |
| CAGCCGTGGAAATCCTTCCG  | 265852 | 328965              | TTCTAATACGACTCACTATAGCAGCCGTGGAAATCCTTCCGGTTTTAGAGCTAGA  |
| TAGCACTTAAAAGAGGAATG  | 270963 | 334078 (off target) | TTCTAATACGACTCACTATAGTAGCACTTAAAAGAGGAATGGTTTTAGAGCTAGA  |
| TTACTCAAATAGTGC GTTAT | 275716 | 338834              | TTCTAATACGACTCACTATAGTTACTCAAATAGTGC GTTATGTTTTAGAGCTAGA |
| GCCTGATGTGGATTCTATTG  | 282039 | #N/A                | TTCTAATACGACTCACTATAGGCCTGATGTGGATTCTATTGGTTTTAGAGCTAGA  |
| GCTCTGCCAATAATTTCTCA  | 289780 | 352752              | TTCTAATACGACTCACTATAGGCTCTGCCAATAATTTCTCAGTTTTAGAGCTAGA  |
| TAATCAAGCATTAGATAGCT  | 296956 | No label            | TTCTAATACGACTCACTATAGTAATCAAGCATTAGATAGCTGTTTTAGAGCTAGA  |
| TTTTGCATAATTCGGGGATC  | 301117 | 364094              | TTCTAATACGACTCACTATAGTTTTGCATAATTCGGGGATCGTTTTAGAGCTAGA  |
| GCGAGTTTACTTTGAAATCG  | 306311 | 368783              | TTCTAATACGACTCACTATAGGCGAGTTTACTTTGAAATCGGTTTTAGAGCTAGA  |
| TATTGGATGATTTTGACACT  | 311699 | 374169              | TTCTAATACGACTCACTATAGTATTGGATGATTTTGACACTGTTTTAGAGCTAGA  |
| ATTTAAACGAATCCGAGTGA  | 316712 | 379182              | TTCTAATACGACTCACTATAGATTTAAACGAATCCGAGTGAGTTTTAGAGCTAGA  |
| TTACTCTTGATTAGTGGTA   | 322607 | #N/A                | TTCTAATACGACTCACTATAGTTACTCTTGATTAGTGGTAGTTTTAGAGCTAGA   |

**Supplementary Table 2. A set of 162 sgRNAs designed based on RR722 reference sequences.** sgRNA sequences are shown in black. The 55mer oligo are ordered and used in sgRNA synthesis, with the promoter sequence in red and the overlap sequence in green.

| sgRNA                 | RD location | 55mer oligo                                              |
|-----------------------|-------------|----------------------------------------------------------|
| CAAAGCGCACCACGACTGAC  | 5938        | TTCTAATACGACTCACTATAGCAAAGCGCACCACGACTGACGTTTTAGAGCTAGA  |
| ACTGAACCTTGCAGTACCTC  | 12179       | TTCTAATACGACTCACTATAGACTGAACCTTGCAGTACCTCGTTTTAGAGCTAGA  |
| TTTGTGTACTCAGCCCGACC  | 19802       | TTCTAATACGACTCACTATAGTTTGTGTACTCAGCCCGACCGTTTTAGAGCTAGA  |
| AGTAGCCGTTGCAGGGACAC  | 26907       | TTCTAATACGACTCACTATAGAGTAGCCGTTGCAGGGACACGTTTTAGAGCTAGA  |
| ATTGGAAAAAAACAGGCCAC  | 34250       | TTCTAATACGACTCACTATAGATTGGAAAAAAACAGGCCACGTTTTAGAGCTAGA  |
| GTAGTGGATAACAACCTCGGC | 50008       | TTCTAATACGACTCACTATAGGTAGTGGATAACAACCTCGGCGTTTTAGAGCTAGA |
| AATAAACATCACCTGTACAC  | 58678       | TTCTAATACGACTCACTATAGAATAAACATCACCTGTACACGTTTTAGAGCTAGA  |
| CGAAAAAATTTTCGGCGGGC  | 70676       | TTCTAATACGACTCACTATAGCGAAAAAATTTTCGGCGGGCGTTTTAGAGCTAGA  |
| CAATGGCTAATTGGGCTCGG  | 78546       | TTCTAATACGACTCACTATAGCAATGGCTAATTGGGCTCGGGTTTTAGAGCTAGA  |
| TTTATGATAAAAGGACTCGC  | 86825       | TTCTAATACGACTCACTATAGTTTATGATAAAAGGACTCGCGTTTTAGAGCTAGA  |
| ATGTAGCTCGGTTCGACTCC  | 91668       | TTCTAATACGACTCACTATAGATGTAGCTCGGTTCGACTCCGTTTTAGAGCTAGA  |
| AGAAAGTGGGGCGGGAGCCT  | 108151      | TTCTAATACGACTCACTATAGAGAAAGTGGGGCGGGAGCCTGTTTTAGAGCTAGA  |
| AATACAGGTACTGCCCCGCG  | 119595      | TTCTAATACGACTCACTATAGAATACAGGTACTGCCCCGCGGTTTTAGAGCTAGA  |
| TAGCTCAGTTGGTAGAGCCC  | 129036      | TTCTAATACGACTCACTATAGTAGCTCAGTTGGTAGAGCCCGTTTTAGAGCTAGA  |
| GCACCAATTCCGCCCGCCCC  | 153371      | TTCTAATACGACTCACTATAGGCACCAATTCCGCCCGCCCCGTTTTAGAGCTAGA  |
| TTACAAACCAATGCCGTCGA  | 162155      | TTCTAATACGACTCACTATAGTTACAAACCAATGCCGTCGAGTTTTAGAGCTAGA  |
| CAAAGCAACGACCAACAGCC  | 168440      | TTCTAATACGACTCACTATAGCAAAGCAACGACCAACAGCCGTTTTAGAGCTAGA  |
| ATTGTAGAAGTACCGAGAGC  | 189456      | TTCTAATACGACTCACTATAGATTGTAGAAGTACCGAGAGCGTTTTAGAGCTAGA  |
| CGATTAATGGCAGTGGACAC  | 205901      | TTCTAATACGACTCACTATAGCGATTAATGGCAGTGGACACGTTTTAGAGCTAGA  |
| ATACAATGTTGAAGCGCCTC  | 223392      | TTCTAATACGACTCACTATAGATACAATGTTGAAGCGCCTCGTTTTAGAGCTAGA  |
| GCGGCGATTGTTTCCTTCCC  | 232915      | TTCTAATACGACTCACTATAGGCGGCGATTGTTTCCTTCCCGTTTTAGAGCTAGA  |
| GCGGGTACAGAAGAGGCTCC  | 250043      | TTCTAATACGACTCACTATAGGCGGGTACAGAAGAGGCTCCGTTTTAGAGCTAGA  |
| GCGGCGGGTAAAATCCCGGG  | 258497      | TTCTAATACGACTCACTATAGGCGGCGGGTAAAATCCCGGGGTTTTAGAGCTAGA  |
| GCTTTTTGCCCCCTCCTCTC  | 265487      | TTCTAATACGACTCACTATAGGCTTTTTGCCCCCTCCTCTCGTTTTAGAGCTAGA  |
| TGGTTATTTTATCTTCCCGG  | 274257      | TTCTAATACGACTCACTATAGTGGTTATTTTATCTTCCCGGTTTTAGAGCTAGA   |

|                       |        |                                                          |
|-----------------------|--------|----------------------------------------------------------|
| CCGCCGCCACTGCCTCCCTC  | 279533 | TTCTAATACGACTCACTATAGCCGCCGCCACTGCCTCCCTCGTTTTAGAGCTAGA  |
| TATCCAAAGGCTCTCACTCC  | 285332 | TTCTAATACGACTCACTATAGTATCCAAAGGCTCTCACTCCGTTTTAGAGCTAGA  |
| CAGTGAAATTAGCGGCAGGC  | 302615 | TTCTAATACGACTCACTATAGCAGTGAAATTAGCGGCAGGCGTTTTAGAGCTAGA  |
| GCAATACGCTCACTACGCGC  | 313570 | TTCTAATACGACTCACTATAGGCAATACGCTCACTACGCGCGTTTTAGAGCTAGA  |
| CGTAATATTTGACGAGACTC  | 321776 | TTCTAATACGACTCACTATAGCGTAATATTTGACGAGACTCGTTTTAGAGCTAGA  |
| TTGGCGATTCTATCGGGCCT  | 337549 | TTCTAATACGACTCACTATAGTTGGCGATTCTATCGGGCCTGTTTTAGAGCTAGA  |
| TAACCAGTTACGCGAGAGCC  | 346272 | TTCTAATACGACTCACTATAGTAACCAGTTACGCGAGAGCCGTTTTAGAGCTAGA  |
| GAAATCGTCGATACAGACCC  | 355793 | TTCTAATACGACTCACTATAGGAAATCGTCGATACAGACCCGTTTTAGAGCTAGA  |
| TGTATTGGGACTGGACTCCA  | 365830 | TTCTAATACGACTCACTATAGTGTATTGGGACTGGACTCCAGTTTTAGAGCTAGA  |
| AGTTATTTTTCCCGATCCT   | 368652 | TTCTAATACGACTCACTATAGAGTTATTTTTCCCGATCCTGTTTTAGAGCTAGA   |
| ATCTAATGCACCACTAGGAC  | 373328 | TTCTAATACGACTCACTATAGATCTAATGCACCACTAGGACGTTTTAGAGCTAGA  |
| TCGGAGACGAGTGCCTCGCC  | 392488 | TTCTAATACGACTCACTATAGTCGGAGACGAGTGCCTCGCCGTTTTAGAGCTAGA  |
| GTCAAAGTGTTTCGCGGGCC  | 400723 | TTCTAATACGACTCACTATAGGTCAAAGTGTTTCGCGGGCCGTTTTAGAGCTAGA  |
| TGTTTCGTGCCGTGGGAGGCG | 423932 | TTCTAATACGACTCACTATAGTGTTTCGTGCCGTGGGAGGCGGTTTTAGAGCTAGA |
| CCTCGCACCAAAGAGATCCG  | 447969 | TTCTAATACGACTCACTATAGCCTCGCACCAAAGAGATCCGGTTTTAGAGCTAGA  |
| GAAACTTACGTTGTCTTCC   | 464749 | TTCTAATACGACTCACTATAGGAAACTTACGTTGTCTTCCGTTTTAGAGCTAGA   |
| TGTTCTGGTAAAGAGACCTC  | 488176 | TTCTAATACGACTCACTATAGTGTTCTGGTAAAGAGACCTCGTTTTAGAGCTAGA  |
| TGTCGGTTGGTAACCTACCG  | 500843 | TTCTAATACGACTCACTATAGTGTCGGTTGGTAACCTACCGGTTTTAGAGCTAGA  |
| TTTCAATTTATTGACCTCCG  | 514817 | TTCTAATACGACTCACTATAGTTTCAATTTATTGACCTCCGGTTTTAGAGCTAGA  |
| CCGCCATTTTATCCCCGGC   | 535877 | TTCTAATACGACTCACTATAGCCGCCATTTTATCCCCGGCGTTTTAGAGCTAGA   |
| CCAACCATTAATCCGTCTCG  | 545907 | TTCTAATACGACTCACTATAGCCAACCATTAATCCGTCTCGGTTTTAGAGCTAGA  |
| ATGGGAAGAAAACCTGACGGA | 560347 | TTCTAATACGACTCACTATAGATGGGAAGAAAACCTGACGGAGTTTTAGAGCTAGA |
| ACTTTCATACGGAGGGCGC   | 563926 | TTCTAATACGACTCACTATAGACTTTCATACGGAGGGCGCGTTTTAGAGCTAGA   |
| TCAACTCACTGGGGACGGC   | 571057 | TTCTAATACGACTCACTATAGTCAACTCACTGGGGACGGCGTTTTAGAGCTAGA   |
| AGCACAATGGGCTTGGACCC  | 589432 | TTCTAATACGACTCACTATAGAGCACAATGGGCTTGGACCCGTTTTAGAGCTAGA  |
| AGTGACATTCCGCACTCGTC  | 592755 | TTCTAATACGACTCACTATAGAGTGACATTCCGCACTCGTCGTTTTAGAGCTAGA  |
| GGTTCGTTACCTTACCCTCC  | 612802 | TTCTAATACGACTCACTATAGGGTTCGTTACCTTACCCTCCGTTTTAGAGCTAGA  |
| TCTACACGTTGATAGGTGCC  | 617003 | TTCTAATACGACTCACTATAGTCTACACGTTGATAGGTGCCGTTTTAGAGCTAGA  |
| TACATTACACCAGTCCCCGG  | 640142 | TTCTAATACGACTCACTATAGTACATTACACCAGTCCCCGGTTTTAGAGCTAGA   |
| TCCATTACTGGTATGGTCCG  | 644963 | TTCTAATACGACTCACTATAGTCCATTACTGGTATGGTCCGGTTTTAGAGCTAGA  |
| GGATTTAGAAAACGGCGCGC  | 649833 | TTCTAATACGACTCACTATAGGGATTTAGAAAACGGCGCGCGTTTTAGAGCTAGA  |

|                       |        |                                                          |
|-----------------------|--------|----------------------------------------------------------|
| GGAACCAACGCACGGAACCC  | 662891 | TTCTAATACGACTCACTATAGGGAACCAACGCACGGAACCCGTTTTAGAGCTAGA  |
| CCCGCTCGTTTTGACCTACG  | 683811 | TTCTAATACGACTCACTATAGCCCGCTCGTTTTGACCTACGGTTTTAGAGCTAGA  |
| GCTGATGTGTTACTCCATCC  | 686592 | TTCTAATACGACTCACTATAGGCTGATGTGTTACTCCATCCGTTTTAGAGCTAGA  |
| TTTGTTACTTTTAGTCCCGT  | 705452 | TTCTAATACGACTCACTATAGTTTGTTACTTTTAGTCCCGTGTTTTTAGAGCTAGA |
| GCCCAAATGCACGGACTAG   | 722377 | TTCTAATACGACTCACTATAGGCCCAAATGCACGGACTAGGTTTTTAGAGCTAGA  |
| GATGCGGATATTCTCGTCCC  | 728971 | TTCTAATACGACTCACTATAGGATGCGGATATTCTCGTCCCCTTTTTAGAGCTAGA |
| ACAAAGCTGAAAACGGCCAG  | 751612 | TTCTAATACGACTCACTATAGACAAAGCTGAAAACGGCCAGGTTTTTAGAGCTAGA |
| CCGGAGATGACGCCCTCCG   | 753863 | TTCTAATACGACTCACTATAGCCGGAGATGACGCCCTCCGGTTTTAGAGCTAGA   |
| CTCGAGATGTTTCAGGAGAG  | 764238 | TTCTAATACGACTCACTATAGCTCGAGATGTTTCAGGAGAGGTTTTTAGAGCTAGA |
| TGCAACGGTAATGACGGGGC  | 769727 | TTCTAATACGACTCACTATAGTGCAACGGTAATGACGGGGCGTTTTAGAGCTAGA  |
| TTTGCAGAAATTGCTCTGCC  | 779210 | TTCTAATACGACTCACTATAGTTTGCAGAAATTGCTCTGCCGTTTTAGAGCTAGA  |
| TTATATAACTGGCTACCGAC  | 782680 | TTCTAATACGACTCACTATAGTTATATAACTGGCTACCGACGTTTTAGAGCTAGA  |
| AAATCTTTGGTTCTCTCGCC  | 787422 | TTCTAATACGACTCACTATAGAAATCTTTGGTTCTCTCGCCGTTTTAGAGCTAGA  |
| CGGTCACTTTGCGACCTCAG  | 794419 | TTCTAATACGACTCACTATAGCGGTCACTTTGCGACCTCAGGTTTTTAGAGCTAGA |
| TGGTAGCATTGTTCCGTCCG  | 797696 | TTCTAATACGACTCACTATAGTGGTAGCATTGTTCCGTCCGGTTTTAGAGCTAGA  |
| GAGATCAAATGGTGGGTCCCT | 815035 | TTCTAATACGACTCACTATAGGAGATCAAATGGTGGGTCCCTGTTTTAGAGCTAGA |
| GGTGGCGTACTTACTCGCCG  | 828281 | TTCTAATACGACTCACTATAGGGTGGCGTACTTACTCGCCGGTTTTAGAGCTAGA  |
| GCGAACCAAGTAGAGCTCCA  | 842168 | TTCTAATACGACTCACTATAGGCGAACCAAGTAGAGCTCCAGTTTTAGAGCTAGA  |
| GGTTCATTCAATCCGGTTCC  | 849140 | TTCTAATACGACTCACTATAGGGTTCATTCAATCCGGTTCCGTTTTAGAGCTAGA  |
| ATGGTTAAAGGTCCGGGTCC  | 851265 | TTCTAATACGACTCACTATAGATGGTTAAAGGTCCGGGTCCGTTTTAGAGCTAGA  |
| TTAAAAATCAACTCGGATC   | 863749 | TTCTAATACGACTCACTATAGTTAAAAATCAACTCGGATCGTTTTAGAGCTAGA   |
| GCGCAACGTTGCGTACGTCC  | 865933 | TTCTAATACGACTCACTATAGGCGCAACGTTGCGTACGTCCGTTTTAGAGCTAGA  |
| GATTAACTTGGTGGACCCAG  | 873808 | TTCTAATACGACTCACTATAGGATTAACTTGGTGGACCCAGGTTTTTAGAGCTAGA |
| TGAAATCTTATCTCACTCCG  | 875705 | TTCTAATACGACTCACTATAGTGAAATCTTATCTCACTCCGGTTTTAGAGCTAGA  |
| CTGCATTAAAATCACGTGTC  | 900001 | TTCTAATACGACTCACTATAGCTGCATTAAAATCACGTGTCGTTTTAGAGCTAGA  |
| ACTTGATCCACAACCCAGTC  | 915941 | TTCTAATACGACTCACTATAGACTTGATCCACAACCCAGTCGTTTTAGAGCTAGA  |
| ACTTTTGTAAGACCCGACC   | 926544 | TTCTAATACGACTCACTATAGACTTTTGTAAGACCCGACCGTTTTAGAGCTAGA   |
| GCTGCGGCAATTGTCGCCGG  | 933465 | TTCTAATACGACTCACTATAGGCTGCGGCAATTGTCGCCGGGTTTTAGAGCTAGA  |
| CTGAGGTTTTAACTCTCGTC  | 936634 | TTCTAATACGACTCACTATAGCTGAGGTTTTAACTCTCGTCGTTTTAGAGCTAGA  |
| TTACACCAATTAAGCCACCG  | 959006 | TTCTAATACGACTCACTATAGTTACACCAATTAAGCCACCGTTTTAGAGCTAGA   |
| GGAAAAATGGTCCCCCCTAC  | 981428 | TTCTAATACGACTCACTATAGGGAAAAATGGTCCCCCCTACGTTTTAGAGCTAGA  |

|                        |         |                                                           |
|------------------------|---------|-----------------------------------------------------------|
| TCGTGGTATTTTCAGGCCCTG  | 991831  | TTCTAATACGACTCACTATAGTCGTGGTATTTTCAGGCCCTGGTTTTAGAGCTAGA  |
| TTTCCAATTCCACGACGCGG   | 1015992 | TTCTAATACGACTCACTATAGTTTCCAATTCCACGACGCGGGTTTTAGAGCTAGA   |
| AAAACATTTCTTACCGTCTCC  | 1029811 | TTCTAATACGACTCACTATAGAAAACATTTCTTACCGTCTCCGTTTTAGAGCTAGA  |
| AGTTCCTTTTGTTCGGAGGGCC | 1033196 | TTCTAATACGACTCACTATAGAGTTCCTTTTGTTCGGAGGGCCGTTTTAGAGCTAGA |
| TTGGGGGACAAACCCCGGGC   | 1047106 | TTCTAATACGACTCACTATAGTTGGGGGACAAACCCCGGGCGTTTTAGAGCTAGA   |
| TGGCTATCAGCTTCTCGGCC   | 1077442 | TTCTAATACGACTCACTATAGTGGCTATCAGCTTCTCGGCCGTTTTAGAGCTAGA   |
| ATACACTAGAAAGCCTAGTC   | 1082624 | TTCTAATACGACTCACTATAGATACACTAGAAAGCCTAGTCGTTTTAGAGCTAGA   |
| TTTGGCATAATCCCAGCTC    | 1084743 | TTCTAATACGACTCACTATAGTTTGGCATAATCCCAGCTCGTTTTAGAGCTAGA    |
| AAAGCGAAATCTGGTCACCC   | 1089177 | TTCTAATACGACTCACTATAGAAAGCGAAATCTGGTCACCCGTTTTAGAGCTAGA   |
| TTAATGTTGTATTAGGGACG   | 1092341 | TTCTAATACGACTCACTATAGTTAATGTTGTATTAGGGACGGTTTTAGAGCTAGA   |
| ACTCAAGCTGTTTCGCCTACC  | 1096130 | TTCTAATACGACTCACTATAGACTCAAGCTGTTTCGCCTACCGTTTTAGAGCTAGA  |
| AACAGCACCAGTGAGGACGC   | 1104243 | TTCTAATACGACTCACTATAGAACAGCACCAGTGAGGACGCGTTTTAGAGCTAGA   |
| TGAACAGCAAATGGGTAGGG   | 1121583 | TTCTAATACGACTCACTATAGTGAACAGCAAATGGGTAGGGGTTTTAGAGCTAGA   |
| CATCTGCAATCACGGCGCCA   | 1135939 | TTCTAATACGACTCACTATAGCATCTGCAATCACGGCGCCAGTTTTAGAGCTAGA   |
| TGCATATCAGTTGGGAACCC   | 1148111 | TTCTAATACGACTCACTATAGTGCATATCAGTTGGGAACCCGTTTTAGAGCTAGA   |
| AAGAAGATGCAAAACGTCCC   | 1155797 | TTCTAATACGACTCACTATAGAAGAAGATGCAAAACGTCCCGTTTTAGAGCTAGA   |
| TTATTTCTAAAGCACCTCGC   | 1162635 | TTCTAATACGACTCACTATAGTTATTTCTAAAGCACCTCGCGTTTTAGAGCTAGA   |
| GGAACCTCTTGGGGGTCAGC   | 1172132 | TTCTAATACGACTCACTATAGGGAACCTCTTGGGGGTCAGCGTTTTAGAGCTAGA   |
| CATTGACCATTGCCGCAGCG   | 1184003 | TTCTAATACGACTCACTATAGCATTGACCATTGCCGCAGCGGTTTTAGAGCTAGA   |
| TCAGAAGTGAAGGGGCTGCC   | 1190116 | TTCTAATACGACTCACTATAGTCAGAAGTGAAGGGGCTGCCGTTTTAGAGCTAGA   |
| CTGGCTGATTTTCAGGGGGC   | 1208406 | TTCTAATACGACTCACTATAGCTGGCTGATTTTCAGGGGGCGTTTTAGAGCTAGA   |
| CTGGTTTACTCGGTCAGGTC   | 1223913 | TTCTAATACGACTCACTATAGCTGGTTTACTCGGTCAGGTCGTTTTAGAGCTAGA   |
| CGATAACAAAACGACCAGTC   | 1242702 | TTCTAATACGACTCACTATAGCGATAACAAAACGACCAGTCGTTTTAGAGCTAGA   |
| TCATTACAAGGGGTCGTCCC   | 1250893 | TTCTAATACGACTCACTATAGTCATTACAAGGGGTCGTCCCGTTTTAGAGCTAGA   |
| GAACGCGTAGCTGCTCCTCT   | 1255835 | TTCTAATACGACTCACTATAGGAACGCGTAGCTGCTCCTCTGTTTTAGAGCTAGA   |
| CAATATTCGTCATACTCGGG   | 1266838 | TTCTAATACGACTCACTATAGCAATATTCGTCATACTCGGGGTTTTAGAGCTAGA   |
| ATCGTAATAAAAACGACGCC   | 1276011 | TTCTAATACGACTCACTATAGATCGTAATAAAAACGACGCCGTTTTAGAGCTAGA   |
| CAAGTGATTCGAAGTATCCC   | 1287103 | TTCTAATACGACTCACTATAGCAAGTGATTCGAAGTATCCCGTTTTAGAGCTAGA   |
| GTATCAGCAAACGAGTCCA    | 1291289 | TTCTAATACGACTCACTATAGGTATCAGCAAACGAGTCCAGTTTTAGAGCTAGA    |
| GTTCCCTATTGGACGAATCCC  | 1294399 | TTCTAATACGACTCACTATAGGTTCCCTATTGGACGAATCCCGTTTTAGAGCTAGA  |
| GGTTACATTATTCCCGGTCT   | 1297063 | TTCTAATACGACTCACTATAGGGTTACATTATTCCCGGTCTGTTTTAGAGCTAGA   |

|                       |         |                                                          |
|-----------------------|---------|----------------------------------------------------------|
| GACGAATTCGACCAGAACCG  | 1311638 | TTCTAATACGACTCACTATAGGACGAATTCGACCAGAACCGGTTTTAGAGCTAGA  |
| TTCTCTAATTCATAGGCCCC  | 1323307 | TTCTAATACGACTCACTATAGTTCTCTAATTCATAGGCCCCGTTTTAGAGCTAGA  |
| ATTTGCCGTGTCTGGCCCG   | 1325880 | TTCTAATACGACTCACTATAGATTTGCCGTGTCTGGCCCGTTTTAGAGCTAGA    |
| GGATAAATATCAGACATGCC  | 1345521 | TTCTAATACGACTCACTATAGGGATAAATATCAGACATGCCGTTTTAGAGCTAGA  |
| GGGCAAACAATCGTCTCGTC  | 1350573 | TTCTAATACGACTCACTATAGGGGCAAACAATCGTCTCGTCGTTTTAGAGCTAGA  |
| ATCGATATGCCTCCGGGCAC  | 1354718 | TTCTAATACGACTCACTATAGATCGATATGCCTCCGGGCACGTTTTAGAGCTAGA  |
| GGGAATTGAGTGCCAGCGCG  | 1358727 | TTCTAATACGACTCACTATAGGGGAATTGAGTGCCAGCGCGTTTTAGAGCTAGA   |
| GAATGTATGGTTGCCCTGCC  | 1368250 | TTCTAATACGACTCACTATAGGAATGTATGGTTGCCCTGCCGTTTTAGAGCTAGA  |
| ATCACTATCGTGCGTACCCC  | 1383355 | TTCTAATACGACTCACTATAGATCACTATCGTGCGTACCCCGTTTTAGAGCTAGA  |
| GTGCCTAATTGAAAGGAGGC  | 1407888 | TTCTAATACGACTCACTATAGGTGCCTAATTGAAAGGAGGCGTTTTAGAGCTAGA  |
| GTGATTTTAGATTGGGTGCC  | 1437776 | TTCTAATACGACTCACTATAGGTGATTTTAGATTGGGTGCCGTTTTAGAGCTAGA  |
| AGGCATTGGATTCCGGGCCAG | 1453682 | TTCTAATACGACTCACTATAGAGGCATTGGATTCCGGGCCAGGTTTTAGAGCTAGA |
| AATACGTGTTCTGGAACCC   | 1463301 | TTCTAATACGACTCACTATAGAATACGTGTTCTGGAACCCGTTTTAGAGCTAGA   |
| GTTTTTAAAGCGGCACGGAC  | 1485658 | TTCTAATACGACTCACTATAGGTTTTTAAAGCGGCACGGACGTTTTAGAGCTAGA  |
| AACATAAAGAGAAAGACCCT  | 1498821 | TTCTAATACGACTCACTATAGAACATAAAGAGAAAGACCCTGTTTTAGAGCTAGA  |
| AAGCCGAACCATTCGAGGCG  | 1509314 | TTCTAATACGACTCACTATAGAAGCCGAACCATTCGAGGCGGTTTTAGAGCTAGA  |
| GTATTTATCAAACCGGGCAG  | 1530862 | TTCTAATACGACTCACTATAGGTATTTATCAAACCGGGCAGGTTTTAGAGCTAGA  |
| AATGAATAAAGCGCTCTCCG  | 1555782 | TTCTAATACGACTCACTATAGAATGAATAAAGCGCTCTCCGTTTTAGAGCTAGA   |
| ACTCAGCAATTACGCCCCGG  | 1563041 | TTCTAATACGACTCACTATAGACTCAGCAATTACGCCCCGGTTTTAGAGCTAGA   |
| CCCGTGAAGTGGCAGAGGTC  | 1572190 | TTCTAATACGACTCACTATAGCCCGTGAAGTGGCAGAGGTCGTTTTAGAGCTAGA  |
| CCAATCCATTCTGTCAGCCC  | 1578994 | TTCTAATACGACTCACTATAGCCAATCCATTCTGTCAGCCCCTTTTTAGAGCTAGA |
| CACCGAGTATGTCAGACCGC  | 1582385 | TTCTAATACGACTCACTATAGCACCGAGTATGTCAGACCGCGTTTTAGAGCTAGA  |
| TGCTTGGAAGTTCGAGACA   | 1594993 | TTCTAATACGACTCACTATAGTGCTTGGAAGTTCGAGACAGTTTTAGAGCTAGA   |
| GAAAATGAAGAACGCGCGGG  | 1597029 | TTCTAATACGACTCACTATAGGAAAATGAAGAACGCGCGGGGTTTTAGAGCTAGA  |
| TAAATCTTCAAACCTGCGGAC | 1606859 | TTCTAATACGACTCACTATAGTAAATCTTCAAACCTGCGGACGTTTTAGAGCTAGA |
| GAAGCAAAGCACTTCCGCC   | 1612709 | TTCTAATACGACTCACTATAGGAAGCAAAGCACTTCCGCCGTTTTAGAGCTAGA   |
| TATATGAAAAATCATGTCCG  | 1634628 | TTCTAATACGACTCACTATAGTATATGAAAAATCATGTCCGTTTTAGAGCTAGA   |
| GTGCTAGTGACTTCGGGGCC  | 1653303 | TTCTAATACGACTCACTATAGGTGCTAGTGACTTCGGGGCCGTTTTAGAGCTAGA  |
| TAGTGAATTAGATAGGGTAC  | 1664939 | TTCTAATACGACTCACTATAGTAGTGAATTAGATAGGGTACGTTTTAGAGCTAGA  |
| TATTGCTGGTGCAGGGGGGG  | 1683153 | TTCTAATACGACTCACTATAGTATTGCTGGTGCAGGGGGGGTTTTAGAGCTAGA   |
| CAATTGTGCCACCACGTCCG  | 1700535 | TTCTAATACGACTCACTATAGCAATTGTGCCACCACGTCCGTTTTAGAGCTAGA   |

|                      |         |                                                          |
|----------------------|---------|----------------------------------------------------------|
| TGGCGTAAGTGGAACGGGTC | 1710116 | TTCTAATACGACTCACTATAGTGGCGTAAGTGGAACGGGTCGTTTTAGAGCTAGA  |
| TCTGCATATCTGCCCTCCCT | 1714052 | TTCTAATACGACTCACTATAGTCTGCATATCTGCCCTCCCTGTTTTAGAGCTAGA  |
| CAATTGATATTCGCCCCCG  | 1722453 | TTCTAATACGACTCACTATAGCAATTGATATTCGCCCCCGTTTTAGAGCTAGA    |
| ATTCAGCTGTGGCAGGACAG | 1731210 | TTCTAATACGACTCACTATAGATTCAGCTGTGGCAGGACAGGTTTTAGAGCTAGA  |
| AGTGCCGATAACGTCCGGG  | 1746682 | TTCTAATACGACTCACTATAGAGTGCCGATAACGTCCGGGGTTTTAGAGCTAGA   |
| TGCTGATGTTCAAGGCTCCT | 1764720 | TTCTAATACGACTCACTATAGTGCTGATGTTCAAGGCTCCTGTTTTAGAGCTAGA  |
| GTCAAATCAGGTGAGCTCAC | 1776710 | TTCTAATACGACTCACTATAGGTCAAATCAGGTGAGCTCACGTTTTAGAGCTAGA  |
| ACGACCATGGTTGCCGCCCC | 1796447 | TTCTAATACGACTCACTATAGACGACCATGGTTGCCGCCCCGTTTTAGAGCTAGA  |
| ATGTCAAAGGTAGCCCGCCG | 1797663 | TTCTAATACGACTCACTATAGATGTCAAAGGTAGCCCGCCGGTTTTAGAGCTAGA  |
| GCGACATCCGCCATAGGCC  | 1802242 | TTCTAATACGACTCACTATAGGCGACATCCGCCATAGGCCCGTTTTAGAGCTAGA  |
| TTATGGGGAGAGCGAGGTC  | 1804365 | TTCTAATACGACTCACTATAGTTATGGGGAGAGCGAGGTCGTTTTAGAGCTAGA   |
| CATCAGTTACGAGGGCGCGT | 1824887 | TTCTAATACGACTCACTATAGCATCAGTTACGAGGGCGCGTGTTTTTAGAGCTAGA |
| CCTTCAACTTCACCCGGGCG | 1829738 | TTCTAATACGACTCACTATAGCCTTCAACTTCACCCGGGCGGTTTTAGAGCTAGA  |
